# Supplementary material
Source: PubMed Central journal article supplement (PMC1444756)
Supplement: NIHMS5011-supplement-SF1.pdf [file NIHMS5011-supplement-SF1.pdf]

## Supplementary Figure 1

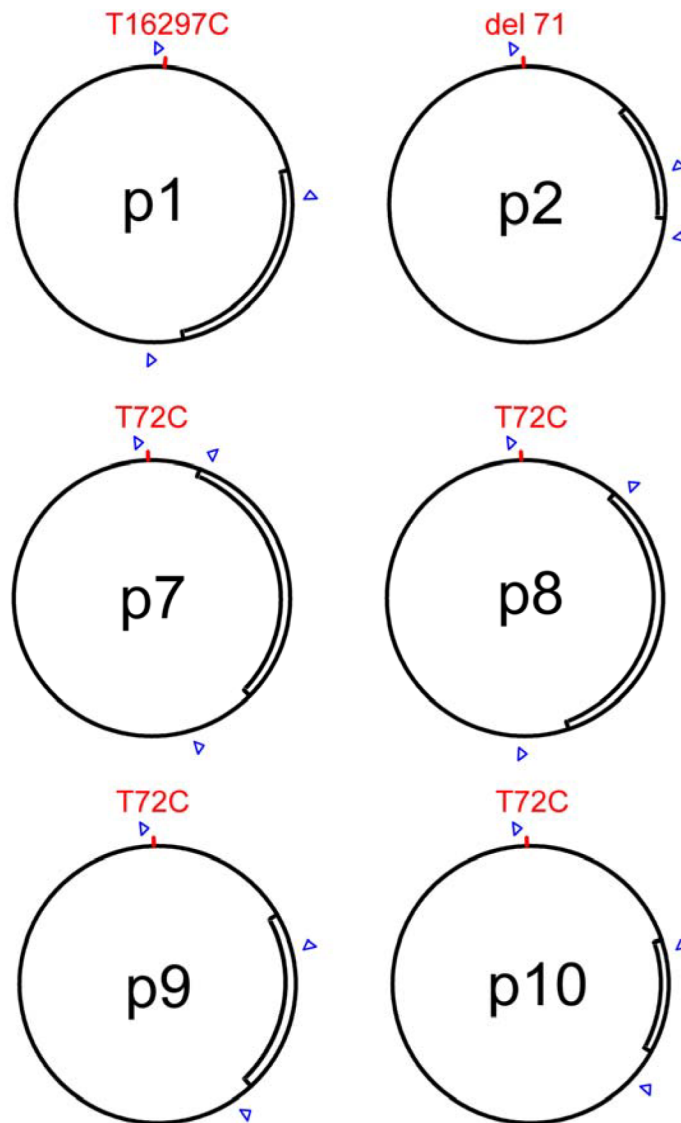

**Schematic representation of positions of deletions, D-loop point mutations and used PCR primers**

Empty arc, deletion; red, D-loop point mutation; blue arrowhead, PCR primer
