# Supplementary material
Source: PubMed Central journal article supplement (PMC1444756)
Supplement: NIHMS5011-supplement-SF3.pdf [file NIHMS5011-supplement-SF3.pdf]

### Supplementary Figure 3

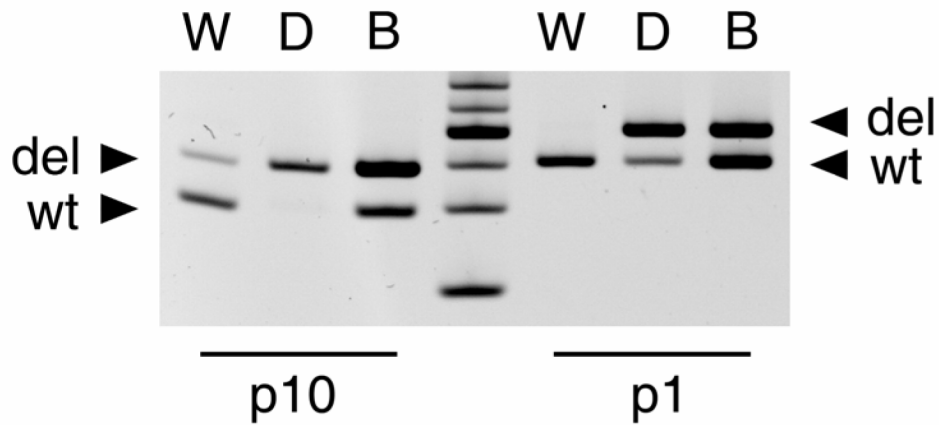

#### Purity of agarose gel electrophoresis-separated genomic DNA samples determined by multiplex PCR

Each PCR was performed using a mixture of three primers: two on each side of the deletion and one inside the deletion. Primers (cf. **Supplementary Table 4** online) were designed so that the deletion-specific products were slightly larger (del, upper bands) than the wild-type specific products (wt, lower bands). Note that the critical fractions, the p1 wild type (p1, lane W) and the p10 deletion (p10, lane D), are free from the contaminating allelic counterparts. In non-fractionated bulk DNA (B) both deleted and non-deleted mitochondrial genomes are detectable. A 25-bp DNA ladder is shown in the middle lane as a reference (thick band, 125 bps).
