# Supplementary material
Source: PubMed Central journal article supplement (PMC1444756)
Supplement: NIHMS5011-supplement-ST1.pdf [file NIHMS5011-supplement-ST1.pdf]

## Supplementary Table 1

### Comparison of D-loop mutant loads as determined in allele-specific PCR products and gel-separated DNA fractions

| Sample       | Wild type           |                        | Deletion            |                        |
|--------------|---------------------|------------------------|---------------------|------------------------|
|              | Allele-specific PCR | Agarose gel separation | Allele-specific PCR | Agarose gel separation |
| p1 (T16297C) | 7 ± 2 %             | 5 %                    | 56 ± 5 %            | 64 %                   |
| p10 (T72C)   | 50 ± 9 %            | 34 %                   | 31 ± 2 %            | 24 %                   |

Within experimental error, a close correspondence of mutation loads determined in allele-specific PCR-separated and high resolution agarose gel electrophoresis-separated samples was observed. The somewhat larger discrepancy for the wild type sample of p10 is most likely related to the lower purity of the agarose gel-purified wild type fraction (cf. **Supplementary Figure 1**, lane W). Note that if the values in this table are to be compared to those in **Table 1**, a correction by the coding region mutant load is necessary (cf. example calculation in Methods).
