# Supplementary material
Source: PubMed Central journal article supplement (PMC1444756)
Supplement: NIHMS5011-supplement-ST2.pdf [file NIHMS5011-supplement-ST2.pdf]

## Supplementary Table 2

### Frequency of heteroplasmic D-loop mutations in post-mitotic tissues

| Mutation | Muscle                    | Brain                    |
|----------|---------------------------|--------------------------|
| T16297C  | < 0.6 % ( <i>n</i> = 168) | 0 % ( <i>n</i> = 24)     |
| del71    | < 0.5 % ( <i>n</i> = 192) | 0 % ( <i>n</i> = 120)    |
| T72C     | 6.5 % ( <i>n</i> = 168)   | 0 % ( <i>n</i> = 135)    |
| A185G    | 11.1 % ( <i>n</i> = 99)   | 4.8 % ( <i>n</i> = 145)  |
| A189G    | 18.2 % ( <i>n</i> = 99)   | 14.5 % ( <i>n</i> = 145) |

All data were obtained by RFLP screening with a detection limit below 1 % degree of heteroplasmy. *n*, number of screened tissue samples from different individuals.
