# Supplementary material
Source: PubMed Central journal article supplement (PMC1444756)
Supplement: NIHMS5011-supplement-ST3.pdf [file NIHMS5011-supplement-ST3.pdf]

### Supplementary Table 3

#### Overview of patients with multiple heteroplasmic mutations in the coding region and the D-loop

| Patient | Mutations               | Gender | Age at biopsy | Phenotype* |
|---------|-------------------------|--------|---------------|------------|
| p1      | del8809–13035 / T16297C | Female | 34            | CPEO       |
| p2      | del12103–14411 / del71  | Male   | 60            | CPEO       |
| p3      | A3243G / A185G / A189G  | Female | 48            | MELAS      |
| p4      | A3243G / A185G / A189G  | Male   | 36            | CPEO       |
| p5      | A3243G / T72C           | Female | 42            | MELAS      |
| p6      | G5835A / T72C           | Male   | 22            | CPEO       |
| p7      | del10311–15571 / T72C   | Male   | 53            | CPEO       |
| p8      | del9098–14651 / T72C    | Male   | 48            | CPEO       |
| p9      | del10198–13755 / T72C   | Male   | 44            | CPEO       |
| p10     | del11032–13232 / T72C   | Female | 78            | CPEO       |

\* CPEO, chronic progressive external ophthalmoplegia; MELAS, mitochondrial encephalomyopathy with lactic acidosis and stroke-like episodes
