# Supplementary material
Source: PubMed Central journal article supplement (PMC1444756)
Supplement: NIHMS5011-supplement-ST4.pdf [file NIHMS5011-supplement-ST4.pdf]

**Supplementary Table 4**      **Primer sequences and mutation detection**

| Allele-specific primers   |        |                                       |                                               |                |
|---------------------------|--------|---------------------------------------|-----------------------------------------------|----------------|
| Mutation                  | Allele | Forward primer                        | Reverse primer                                | Detection      |
| del8809–13035<br>(p1)     | wt     | 12602–12622: TCATCCCTGTAGCATTGTTTCG   | 16348–16328: GACTGTAATGTGCTATGTACG            | MseI           |
|                           | del    | 8282–8301: CCCCTCTAGAGCCCCTGTA        |                                               |                |
| del12103–14411<br>(p2)    | wt     | 13122–13140: CTTCCACCCCCTAGCAGAA      | 148–129: TGAGGCAGGAATCAAAGACA                 | mm-PCR         |
|                           | del    | 11911–11934: CACGTTCTCCTGATCAAATATCAC |                                               |                |
| del10311–15571<br>(p7)    | wt     | 15544–15562: CCACATCAAGCCCGAATGA      | 148–129: TGAGGCAGGAATCAAAGACA                 | SphI+<br>BanII |
|                           | del    | 9140–9163: CTGTCGCCTTAATCCAAGCCTACG   |                                               |                |
| del9098–14651<br>(p8)     | wt     | 14588–14611: CCCCCATAAATAGGAGAAGGCTTA | 148–129: TGAGGCAGGAATCAAAGACA                 | SphI+<br>BanII |
|                           | del    | 8282–8301: CCCCTCTAGAGCCCCTGTA        |                                               |                |
| del10198–13755<br>(p9)    | wt     | 13122–13140: CTTCCACCCCCTAGCAGAA      | 148–129: TGAGGCAGGAATCAAAGACA                 | SphI+<br>BanII |
|                           | del    | 9921–9940: GCCTGATACTGGCATTTTGT       |                                               |                |
| del11032–13232<br>(p10)   | wt     | 13122–13140: CTTCCACCCCCTAGCAGAA      | 148–129: TGAGGCAGGAATCAAAGACA                 | SphI+<br>BanII |
|                           | del    | 10542–10565: CACCTCATATCCTCCCTACTATGC |                                               |                |
| del8426–14138<br>(t1)     | wt     | 13122–13140: CTTCCACCCCCTAGCAGAA      | 148–129: TGAGGCAGGAATCAAAGACA                 | mm-PCR         |
|                           | del    | 8282–8301: CCCCTCTAGAGCCCCTGTA        |                                               |                |
| A3243G(MELAS)<br>(p3–5)   | wt     | 16166–16185: ACCCAATCCACATCAAAC       | 3267–3243: TTAAGTTTTATGCGATTACCGG <u>C</u> CT | mm-PCR         |
|                           | mut    |                                       | 3267–3243: TTAAGTTTTATGCGATTACCGG <u>C</u> CC |                |
| A185G<br>(p3, p4, p11–16) | A      | 164–185: CACCTACGTTCAATATTACAGA       | 265–246: AGCGGCTGTGCAGACATTCA                 | mm-PCR         |
|                           | G      | 164–185: CACCTACGTTCAATATTACAGG       |                                               |                |
